# Supplementary material
Source: Springer Nature journal article supplement (https://www.springermedizin.de/resource/supplementary/12985_2010_1049_MOESM1_ESM.pdf/9609028)

**A**

VE-cadherin

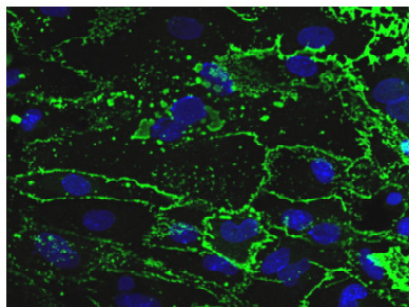

NiV (24 h p.i.)

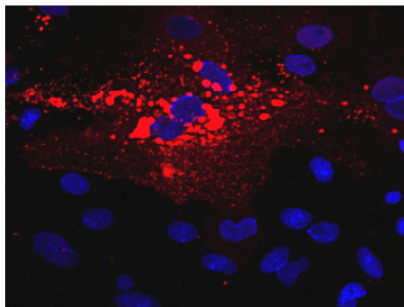

merge

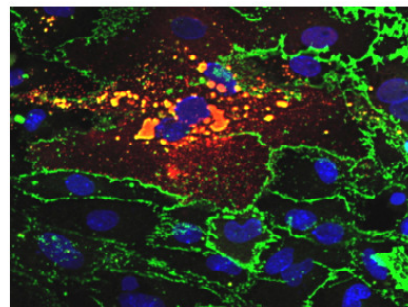**B**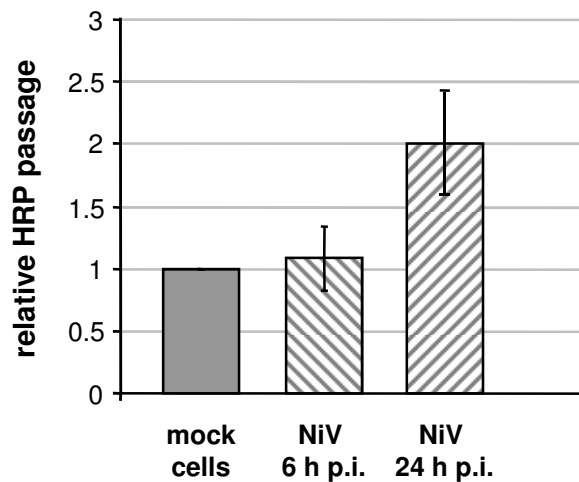

Supplement: MOESM1 [file 9609028]
